# Supplementary material
Source: PubMed Central journal article supplement (PMC4851251)
Supplement: NIHMS461682-supplement-Supplemental_Figures.pdf [file NIHMS461682-supplement-Supplemental_Figures.pdf]

### Figure S1 Control for proteases in CIP preparation

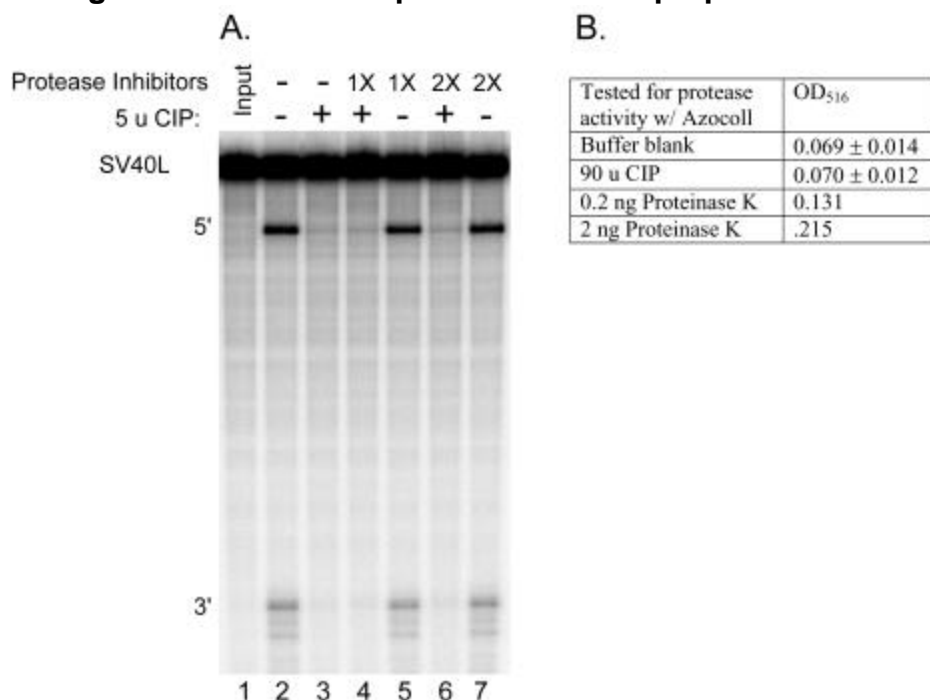

**Figure S1 Protease activity is not detectable in the CIP preparation.** (A) **Protease inhibitors** : HeLa cell nuclear extract was pre-treated with 5 u CIP and 1 mM MgCl<sub>2</sub> with or without the following protease inhibitors, as indicated: (1X) leupeptin (1 µg/ml), pepstatin (0.7 µg/ml), aprotinin (1.8 µg/ml), phosphoramidon (50 µg/ml). (2X, inhibitor concentrations doubled). SV40L pre-mRNA was then added to initiate processing. (B) **Azocoll protease detection assay** – To a 10 mg sample of Azocoll (< 50 mesh, Calbiochem) suspended in 1 ml Buffer D with a 1 mM MgCl<sub>2</sub> excess over the EDTA in Buffer D was added 4.5 µl (90 U) of CIP (Promega). The reaction was agitated at 30 °C for 3.5 h, the reaction tube was centrifuged and the supernatant's absorbance at 516 nm recorded. Proteinase K was used as a positive control. Average of triplicate runs ± SD.

### Figure S2 Confirmation of DEAE separated cleavage factor identity.

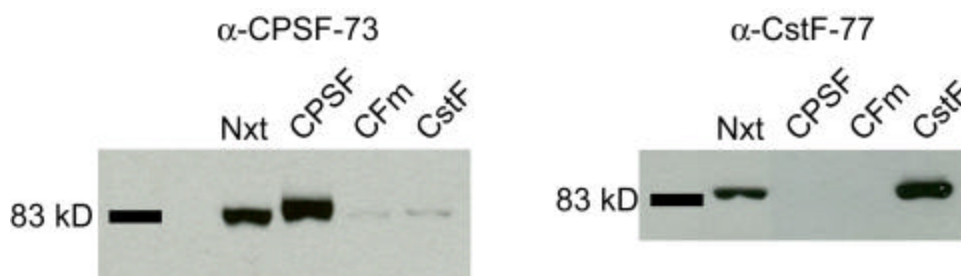

**Figure S2 Western blots of the DEAE-sepharose fractions used for in vitro cleavage.** HeLa nuclear extract (Nxt, ~7 µg) and the indicated protein fractions (~3.5 µg) were resolved on a 10% SDS-acrylamide gel and Western blotted using the indicated antibodies (CPSF-73, Novus H00051692-M01; CstF-77, Novus H00001479-M01). MW marker: NEB P7708S.
